# Supplementary material
Source: PubMed Central journal article supplement (PMC7775907)

## Supplemental Figure Legend

**Supplemental Figure.** Full distribution of Syp-mCherry somatic labeling at all rostro-caudal levels through every injection site. Black nickel-diaminobenzidine (NiDAB) labeling represents immunolabeling for dsRed (Syp-mCherry in somata, dendrites, and axons) with thionin (Nissl) cytoarchitectural counterstaining.

Vglut2 1280

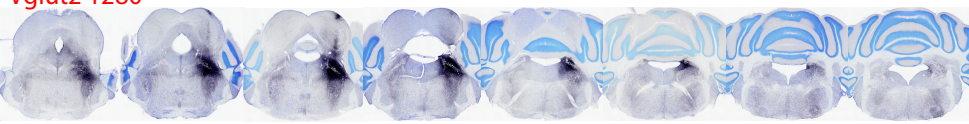

Vglut2 1281

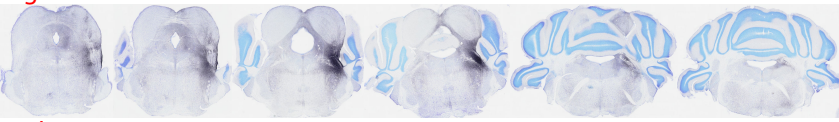

Vglut2 0147

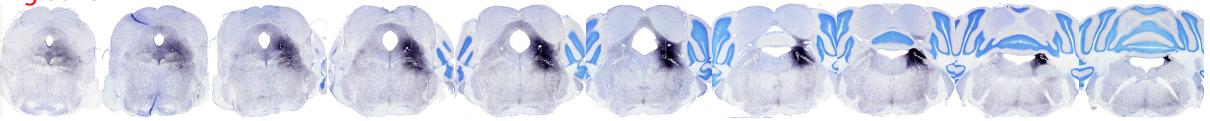

Vglut2 0017

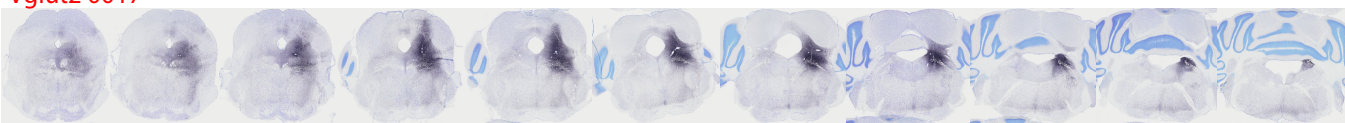

FoxP2 1404

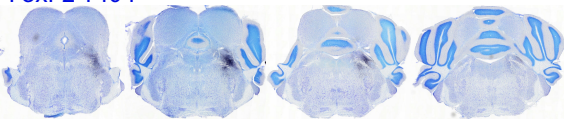

FoxP2 1405

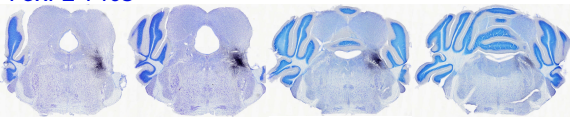

FoxP2 609

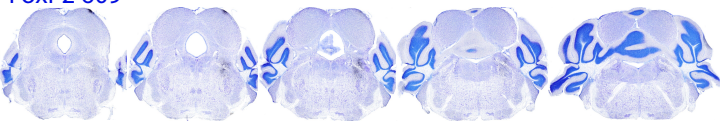

FoxP2 610

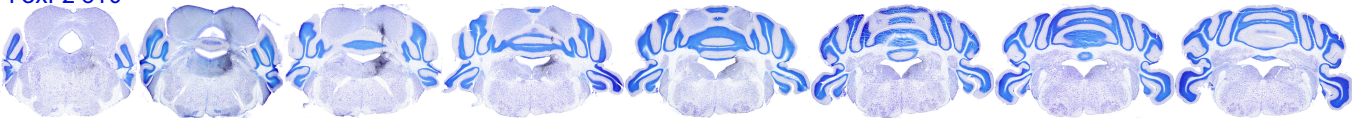

Pdyn 1812

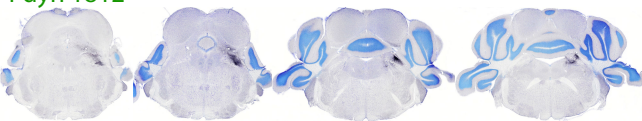

Pdyn 1813

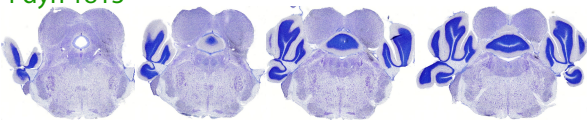

Pdyn 1814

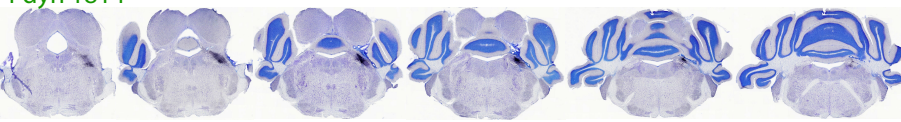

Supplement: NIHMS1607632-supplement-1.pdf [file NIHMS1607632-supplement-1.pdf]
